# Supplementary material for: Establishment of an immunofiltration strip for the detection of 17β-estradiol based on the photothermal effect of black phosphorescence
Source: Royal Society of Chemistry journal article supplement (doi:10.1039/c9an01495k), 2019-01-01
Supplement: c9an01495k1.pdf [file c9an01495k1.pdf]

## Supporting Information

### **Establishment of an immunofiltration strip for the detection of 17 $\beta$ -estradiol based on the photothermal effect of black phosphorescence**

Lixia Lu,<sup>†</sup> Minglu Wang,<sup>†</sup> Dan Zhang, Hongyan Zhang\*

Shandong Provincial Key Laboratory of Animal Resistance Biology,  
Institute of Biomedical Sciences, Key Laboratory of Food Nutrition and  
Safety of Shandong Normal University, College of Life Science,  
Shandong Normal University, Jinan, 250014, PR China.

\*Corresponding Author

\*E-mail: zhanghongyan@sdsnu.edu.cn.

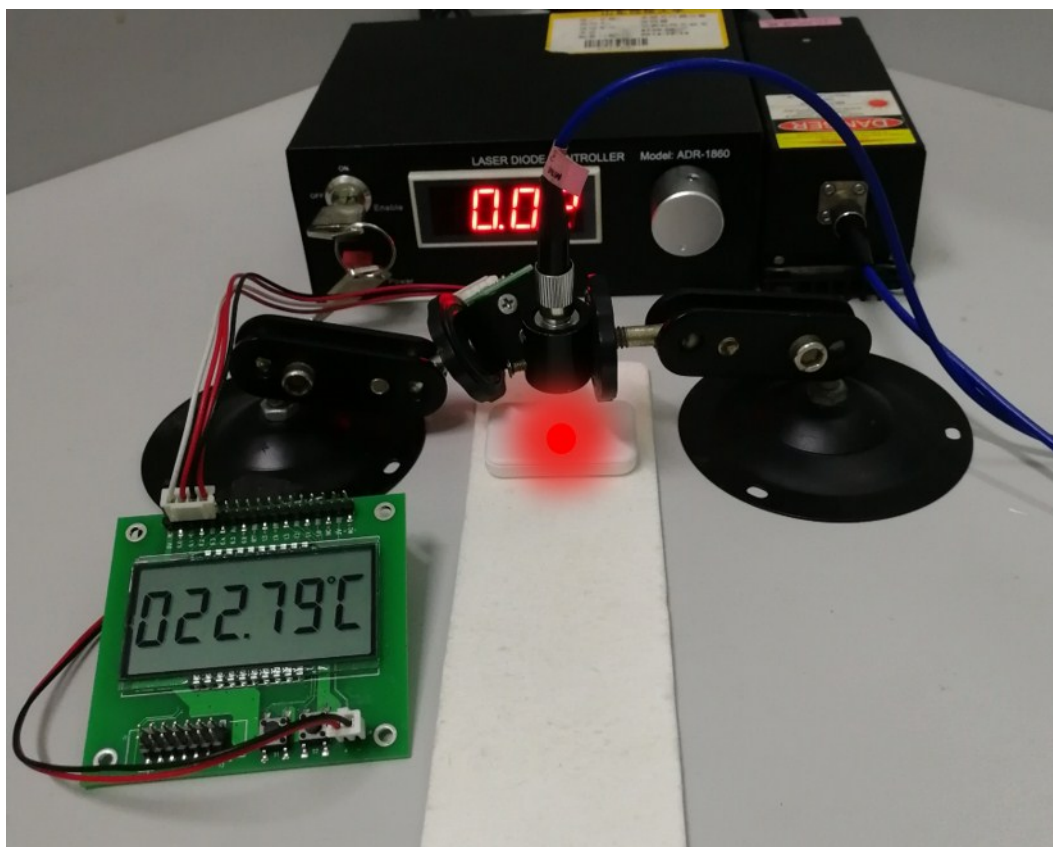

Figure S1. The home-made portable photothermal detection device (808 nm infrared laser and the temperature sensor).

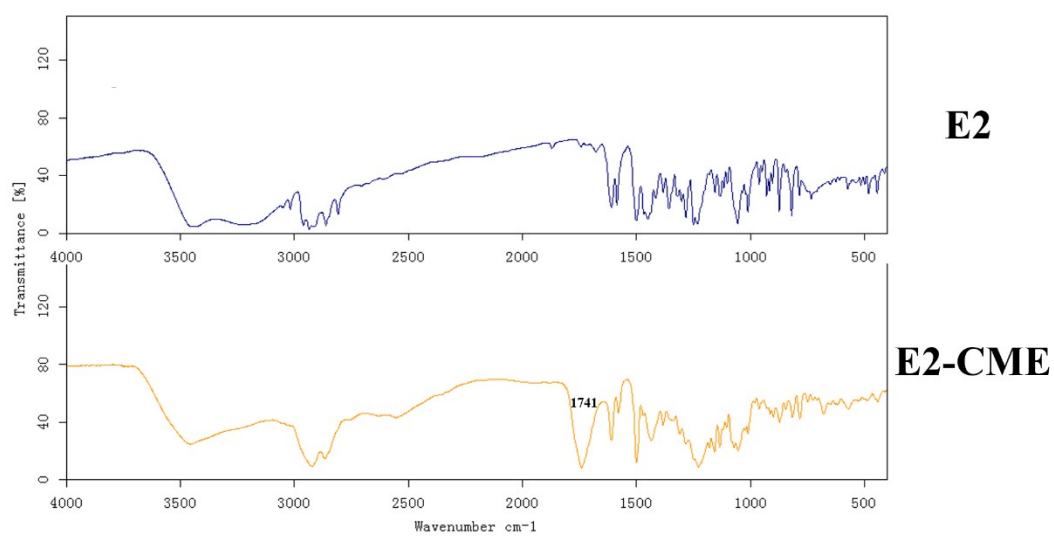

Figure S2. FT-IR spectra of E2 and E2-CME.

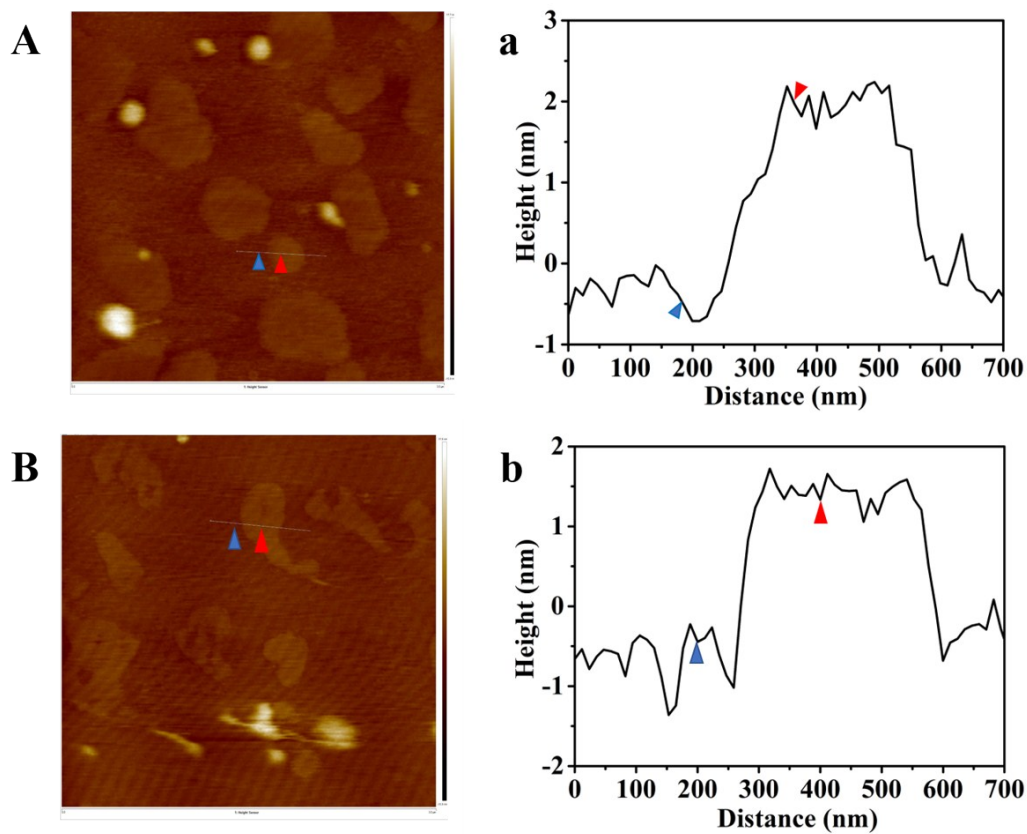

Figure S3. AFM image and height profiles along the black lines of BP nanosheets.

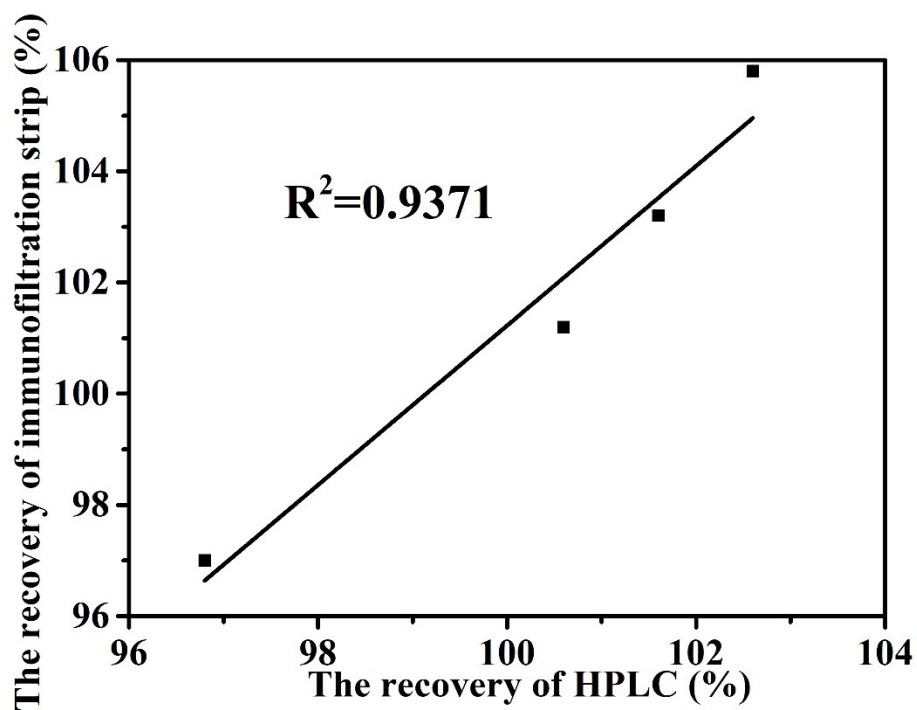

Figure S4. Correlation of the recovery between immunofiltration strip and HPLC method.
